# Supplementary material for: Calibration and analysis of the uncertainty in downscaling global land use and land cover projections from GCAM
Source: Copernicus journal article supplement (doi:10.5194/gmd-2018-248), 2019-01-02

**Supplementary materials for**

**Calibration and analysis of the uncertainty in downscaling global land use and  
land cover projections from GCAM**

Min Chen<sup>1\*</sup>, Chris R. Vernon<sup>2</sup>, Maoyi Huang<sup>2</sup>, Katherine V. Calvin<sup>1</sup>, and Ian P. Kraucunas<sup>2</sup>

<sup>1</sup> Joint Global Change Research Institute, Pacific Northwest National Laboratory, College Park, Maryland  
20740

<sup>2</sup> Atmospheric Sciences and Global Change Division, Pacific Northwest National Laboratory, P.O. Box  
999, Richland, Washington 99352

13 Table S1. Conversion table from CCI-LC product groups to Final Land Types (FLTs).

| CCI-LC groups                              | FLTs    |
|--------------------------------------------|---------|
| no_data                                    | No data |
| cropland_rainfed                           | Crop    |
| cropland_rainfed_herbaceous_cover          | Crop    |
| cropland_rainfed_tree_or_shrub_cover       | Crop    |
| cropland_irrigated                         | Crop    |
| mosaic_cropland                            | Crop    |
| mosaic_natural_vegetation                  | Crop    |
| tree_broadleaved_evergreen_closed_to_open  | Forest  |
| tree_broadleaved_deciduous_closed_to_open  | Forest  |
| tree_broadleaved_deciduous_closed          | Forest  |
| tree_broadleaved_deciduous_open            | Forest  |
| tree_needleleaved_evergreen_closed_to_open | Forest  |
| tree_needleleaved_evergreen_closed         | Forest  |
| tree_needleleaved_evergreen_open           | Forest  |
| tree_needleleaved_deciduous_closed_to_open | Forest  |
| tree_needleleaved_deciduous_closed         | Forest  |
| tree_needleleaved_deciduous_open           | Forest  |
| tree_mixed                                 | Forest  |
| mosaic_tree_and_shrub                      | Forest  |
| mosaic_herbaceous                          | Grass   |
| shrubland                                  | Shrub   |
| shrubland_evergreen                        | Shrub   |
| shrubland_deciduous                        | Shrub   |
| grassland                                  | Grass   |
| lichens_and_mosses                         | Grass   |
| sparse_vegetation                          | Sparse  |
| sparse_shrub                               | Sparse  |
| sparse_herbaceous                          | Sparse  |
| tree_cover_flooded_fresh_or_brakish_water  | Sparse  |
| tree_cover_flooded_saline_water            | Forest  |
| shrub_or_herbaceous_cover_flooded          | Shrub   |
| urban                                      | Urban   |
| bare_areas                                 | Sparse  |
| bare_areas_consolidated                    | Sparse  |
| bare_areas_unconsolidated                  | Sparse  |
| water                                      | No data |
| snow_and_ice                               | Snow    |

15 Figure S1. Spatial pattern of the observed and downscaled Forest density (measured by  
16 percentage fraction of the grid cell), and their differences in 2015.

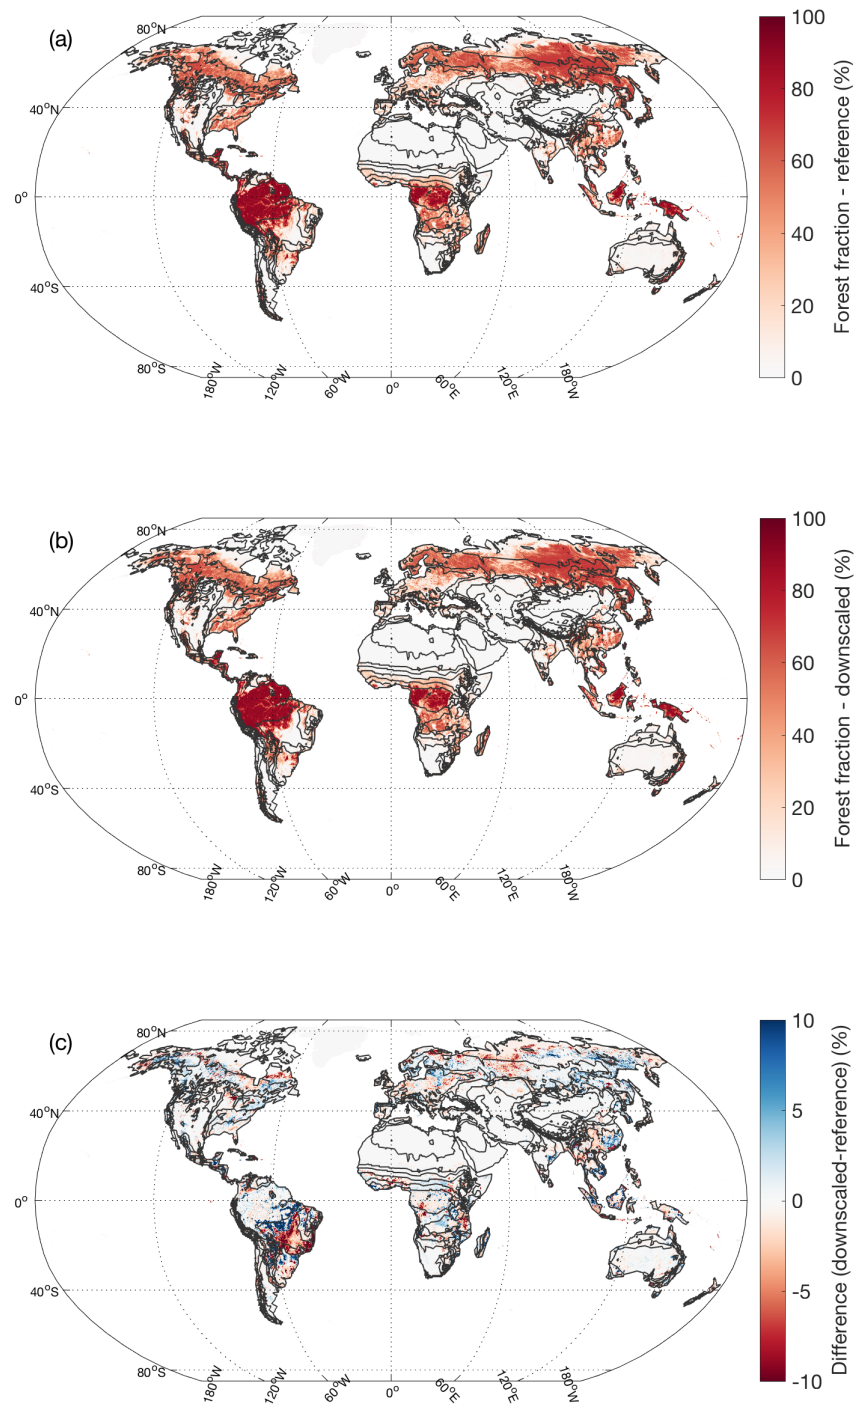

19 Figure S2. Spatial pattern of the observed and downscaled Shrub density (measured by  
20 percentage fraction of the grid cell), and their differences in 2015.

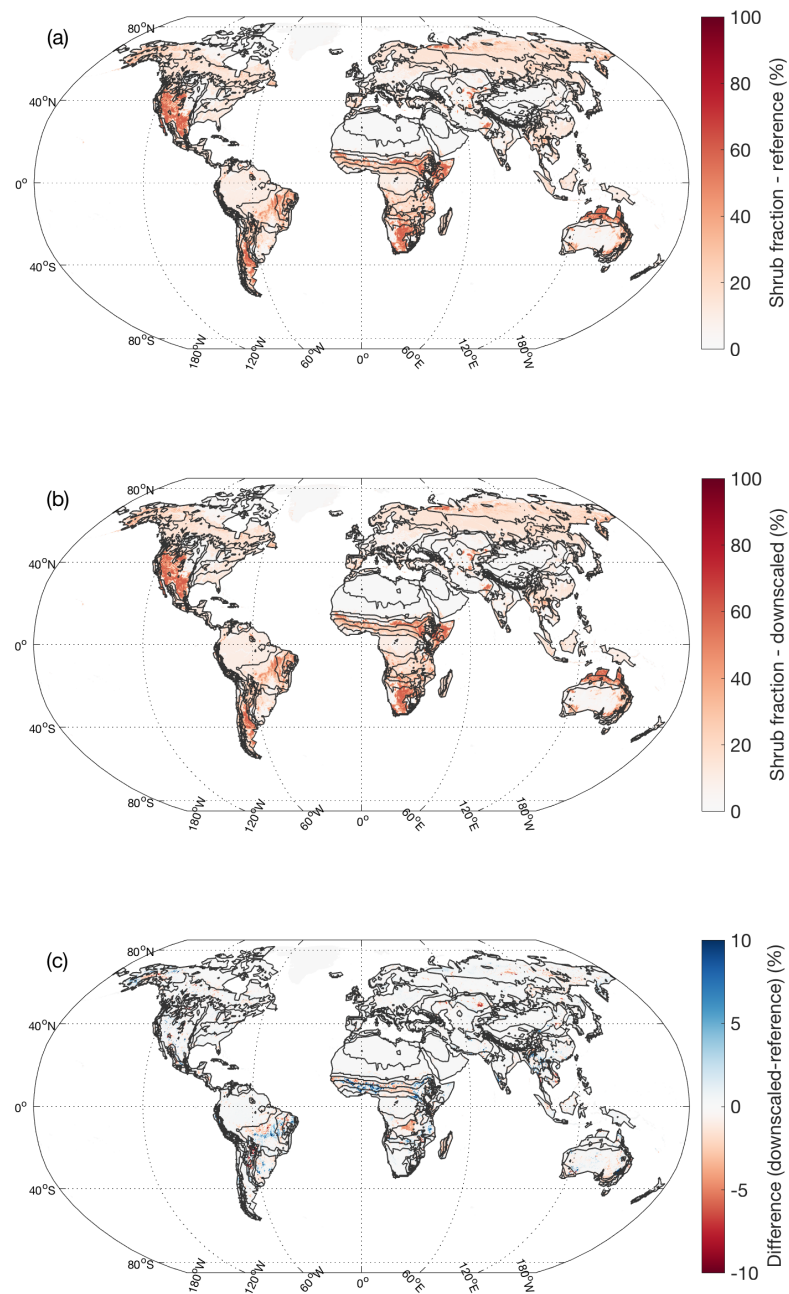

22 Figure S3. Spatial pattern of the observed and downscaled Grass density (measured by  
23 percentage fraction of the grid cell), and their differences in 2015.

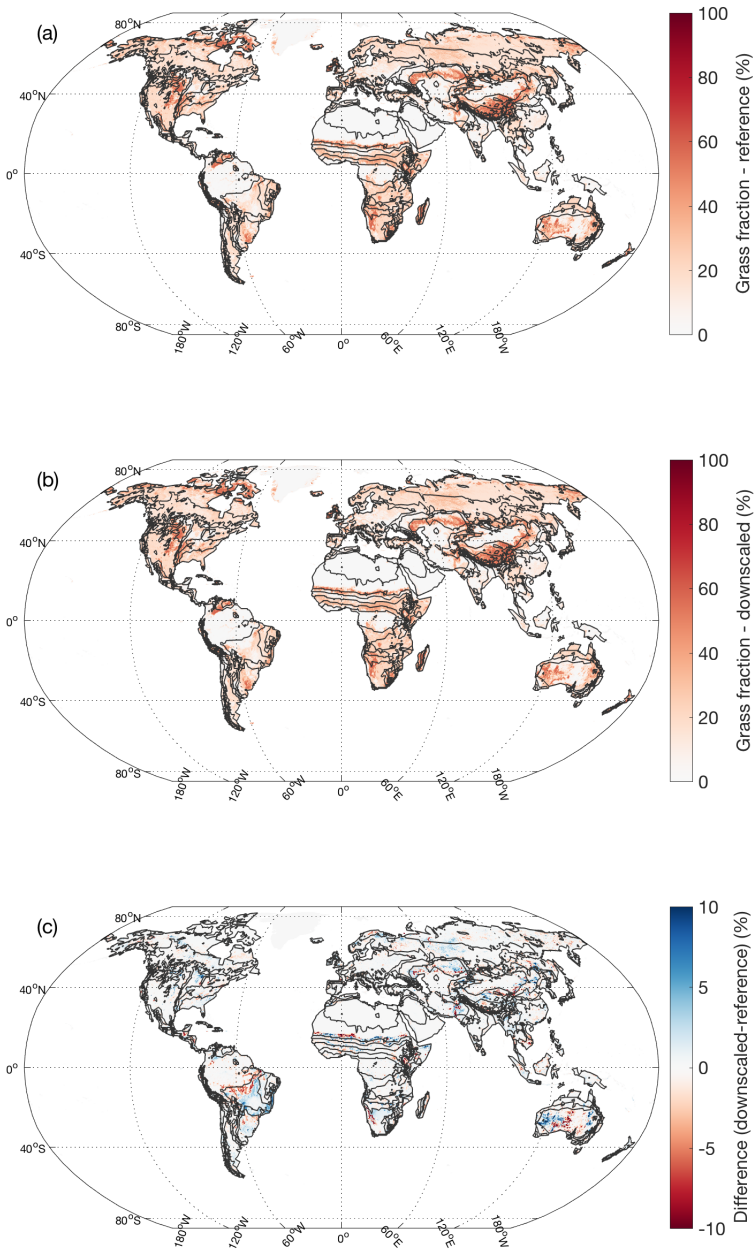

25 Figure S4. Spatial pattern of the observed and downscaled Urban density (measured by  
26 percentage fraction of the grid cell), and their differences in 2015.

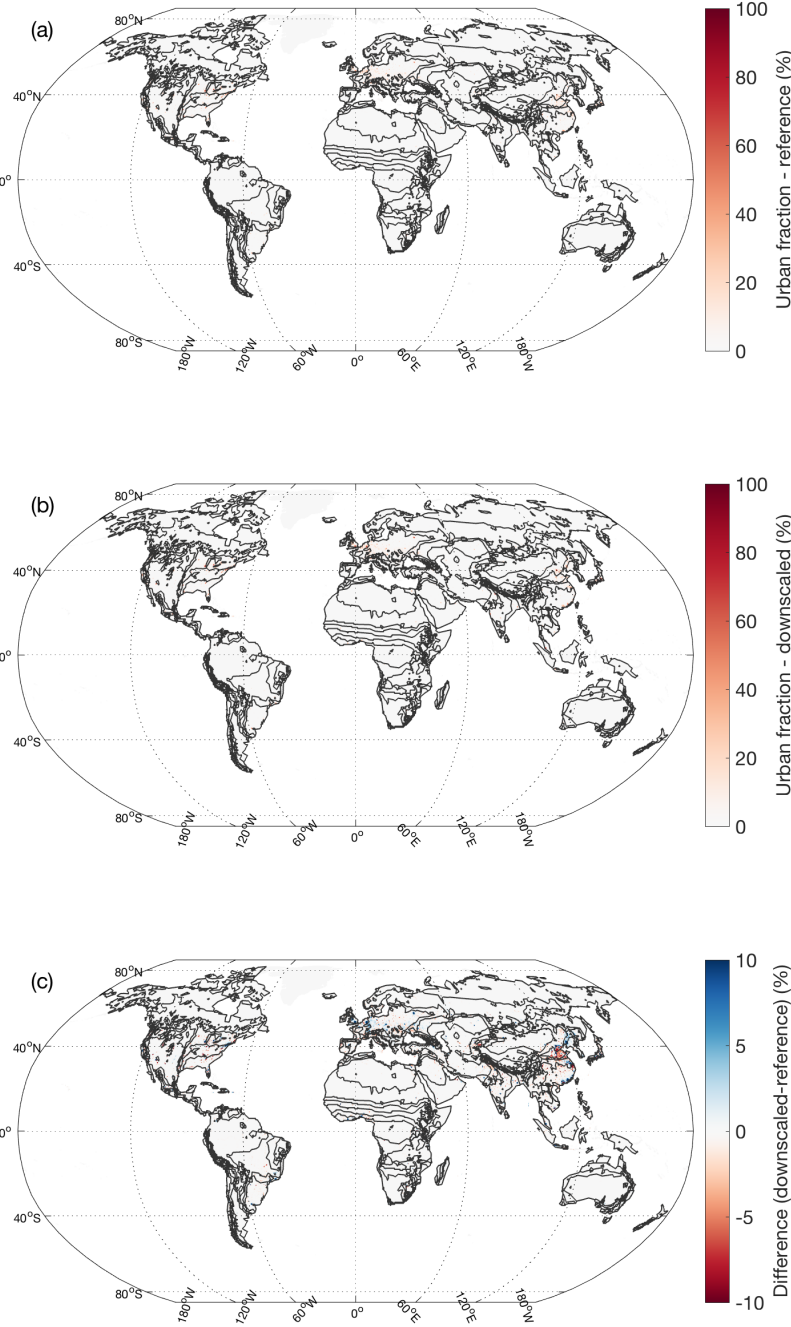

29 Figure S5. Spatial pattern of the observed and downscaled Sparse density (measured by  
30 percentage fraction of the grid cell), and their differences in 2015.

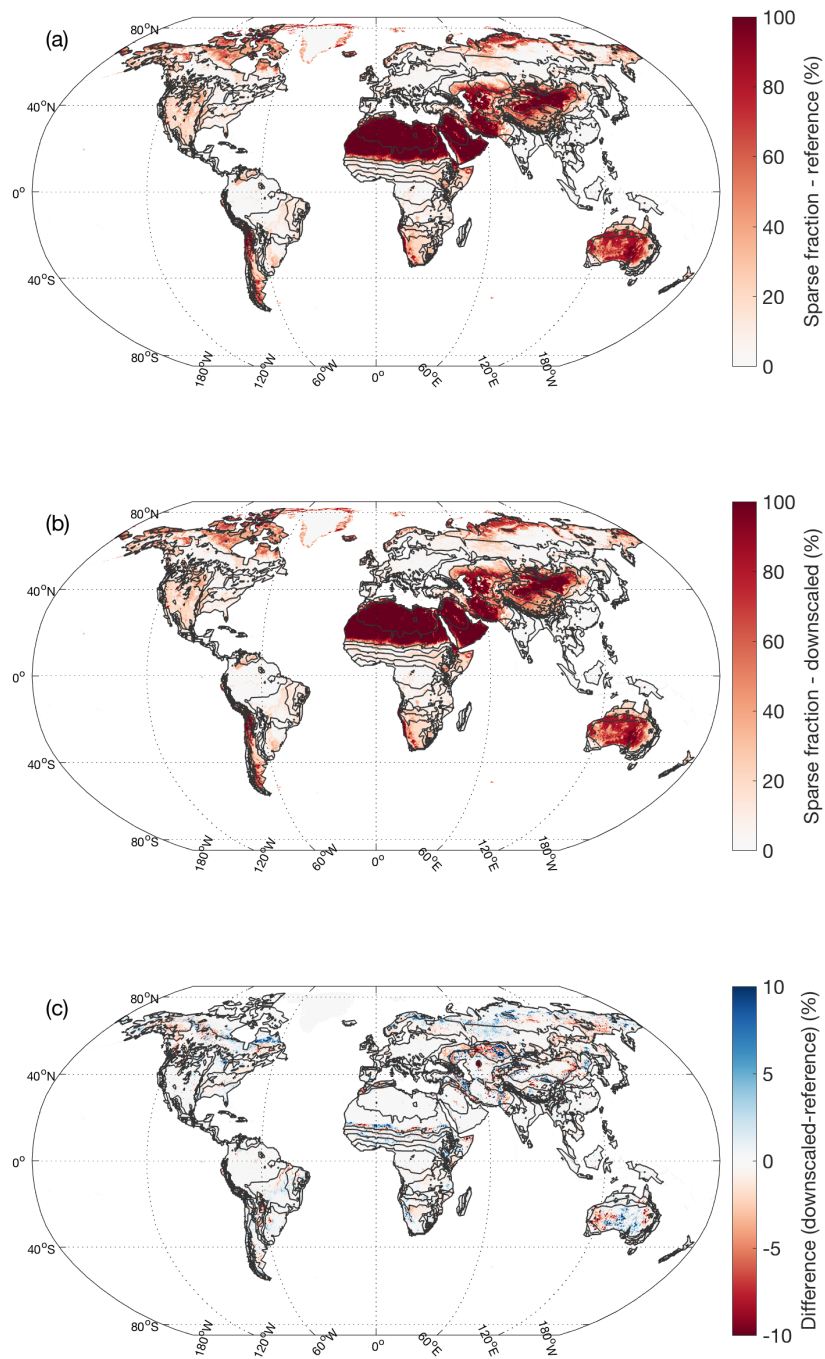

Figure S6. Mean and standard deviations ( $\sigma$ ) for the downscaled Final Land Type (FLT) densities (measured by the percentage fraction of the grid cells) for each FLT and year, when propagating the parameter uncertainties into the GCAM-projected land use and land cover change downscaling in the 21<sup>st</sup> century. The color and the height of the bars indicated the mean and standard deviation, respectively.

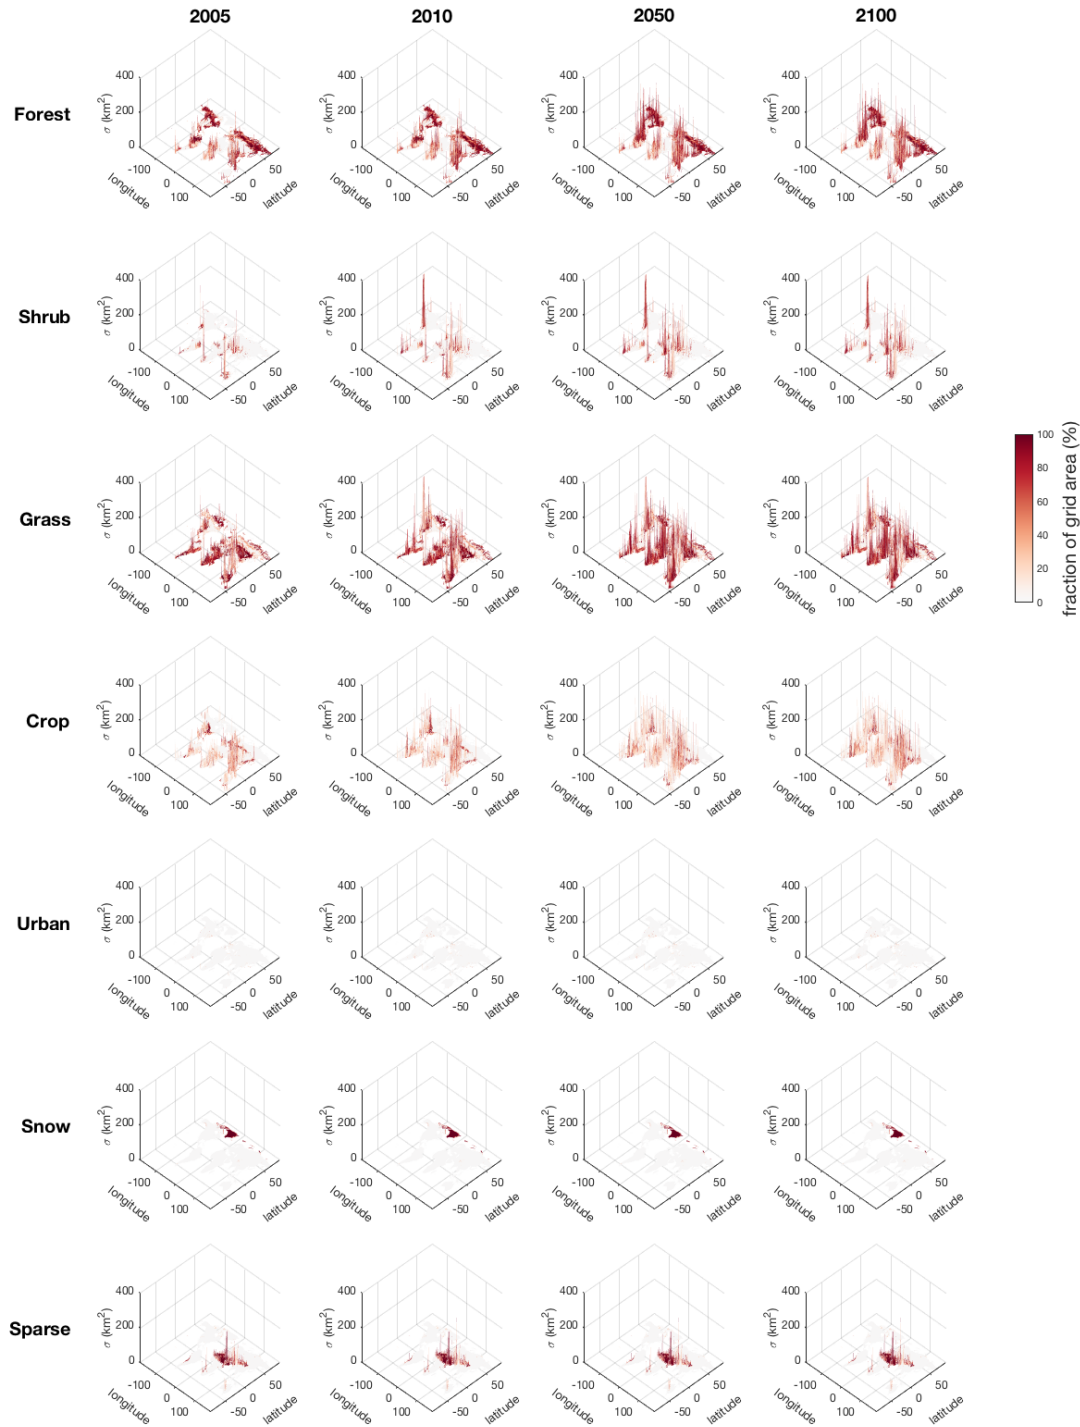



39 Figure S7. Possibility distributions of the ‘best’ 5% parameters for India (a) and United States  
40 (b). The red lines show the optimal values for the two regions. Note that the values of  $D$  were  
41 divided by 100 for the purpose of illustration.

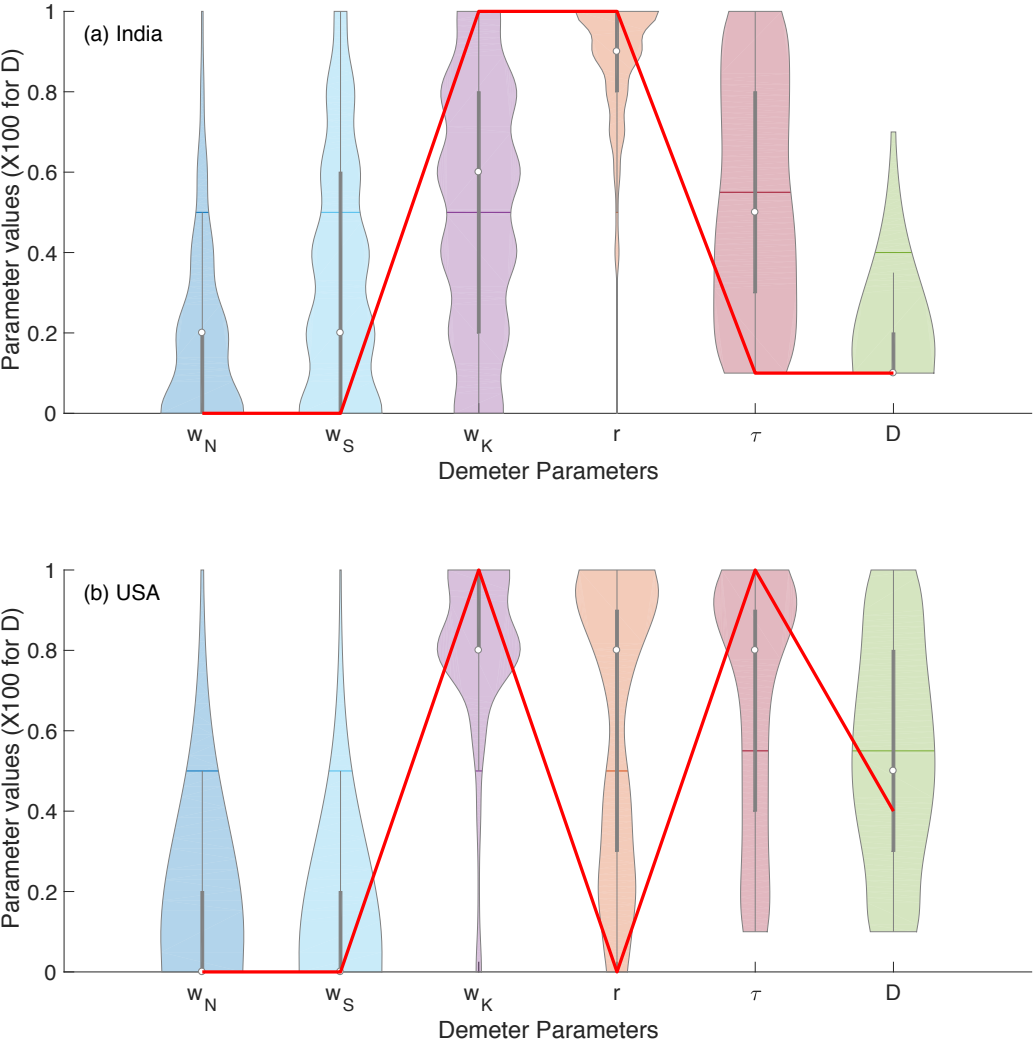

Supplement: Supplementary file 1 [file gmd-2018-248-supplement.pdf]
